# Supplementary material for: Multiple Loci Are Associated with White Blood Cell Phenotypes
Source: PubMed Central journal article supplement (PMC3128114; doi:10.1371/journal.pgen.1002113), 2011-06-30

# Monocytes Chr2:181927546–182127546

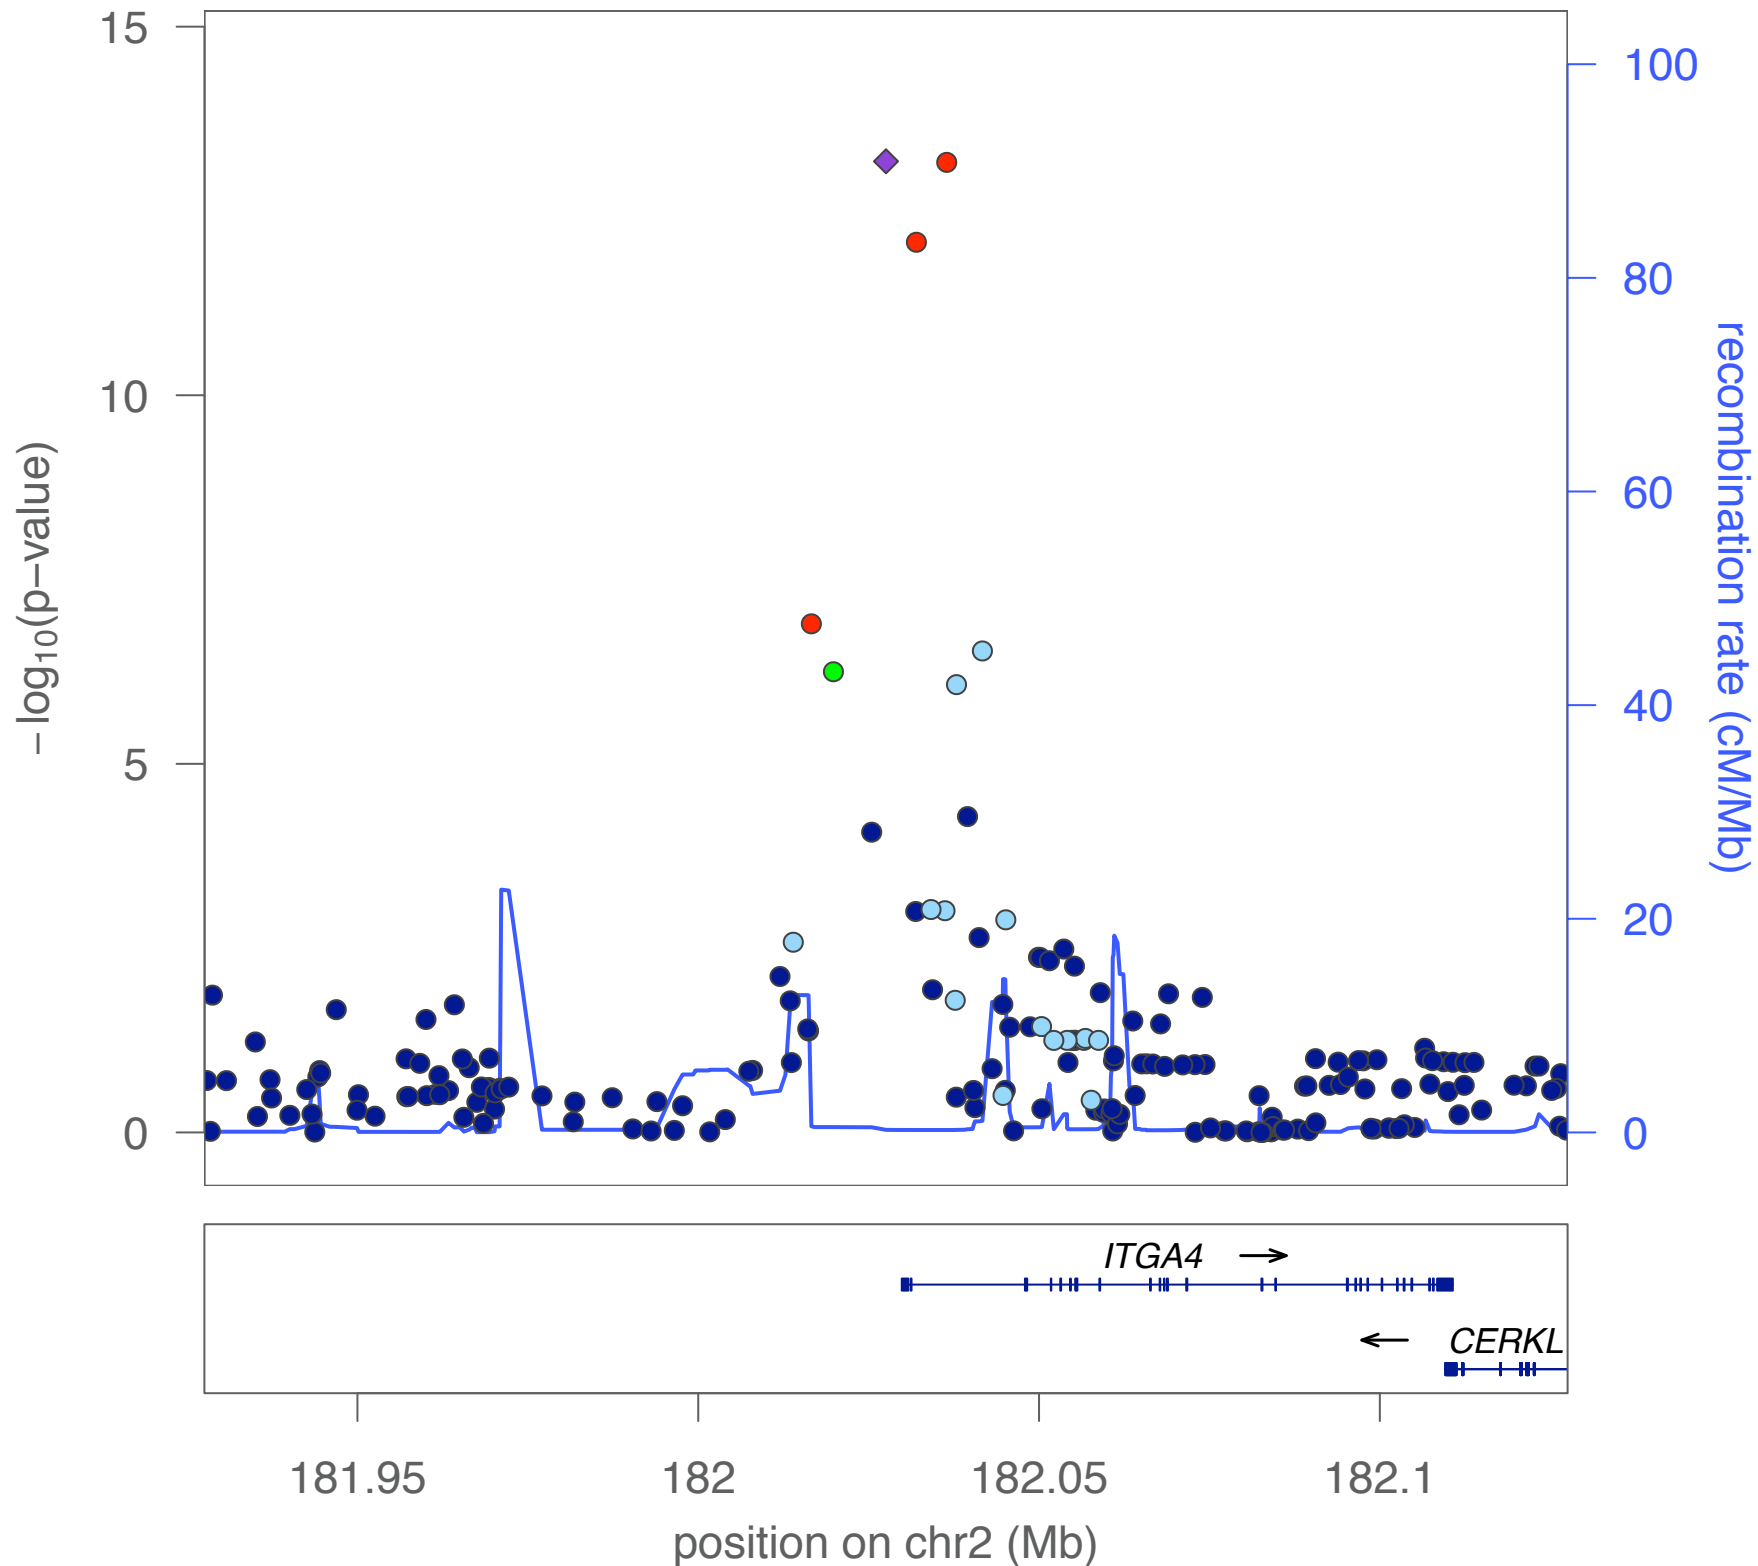

Supplement: pgen.1002113.s007.pdf [file pgen.1002113.s007.pdf]
