# Supplementary material for: Multiple Loci Are Associated with White Blood Cell Phenotypes
Source: PubMed Central journal article supplement (PMC3128114; doi:10.1371/journal.pgen.1002113), 2011-06-30

# Monocytes Chr3:129680259–129880259

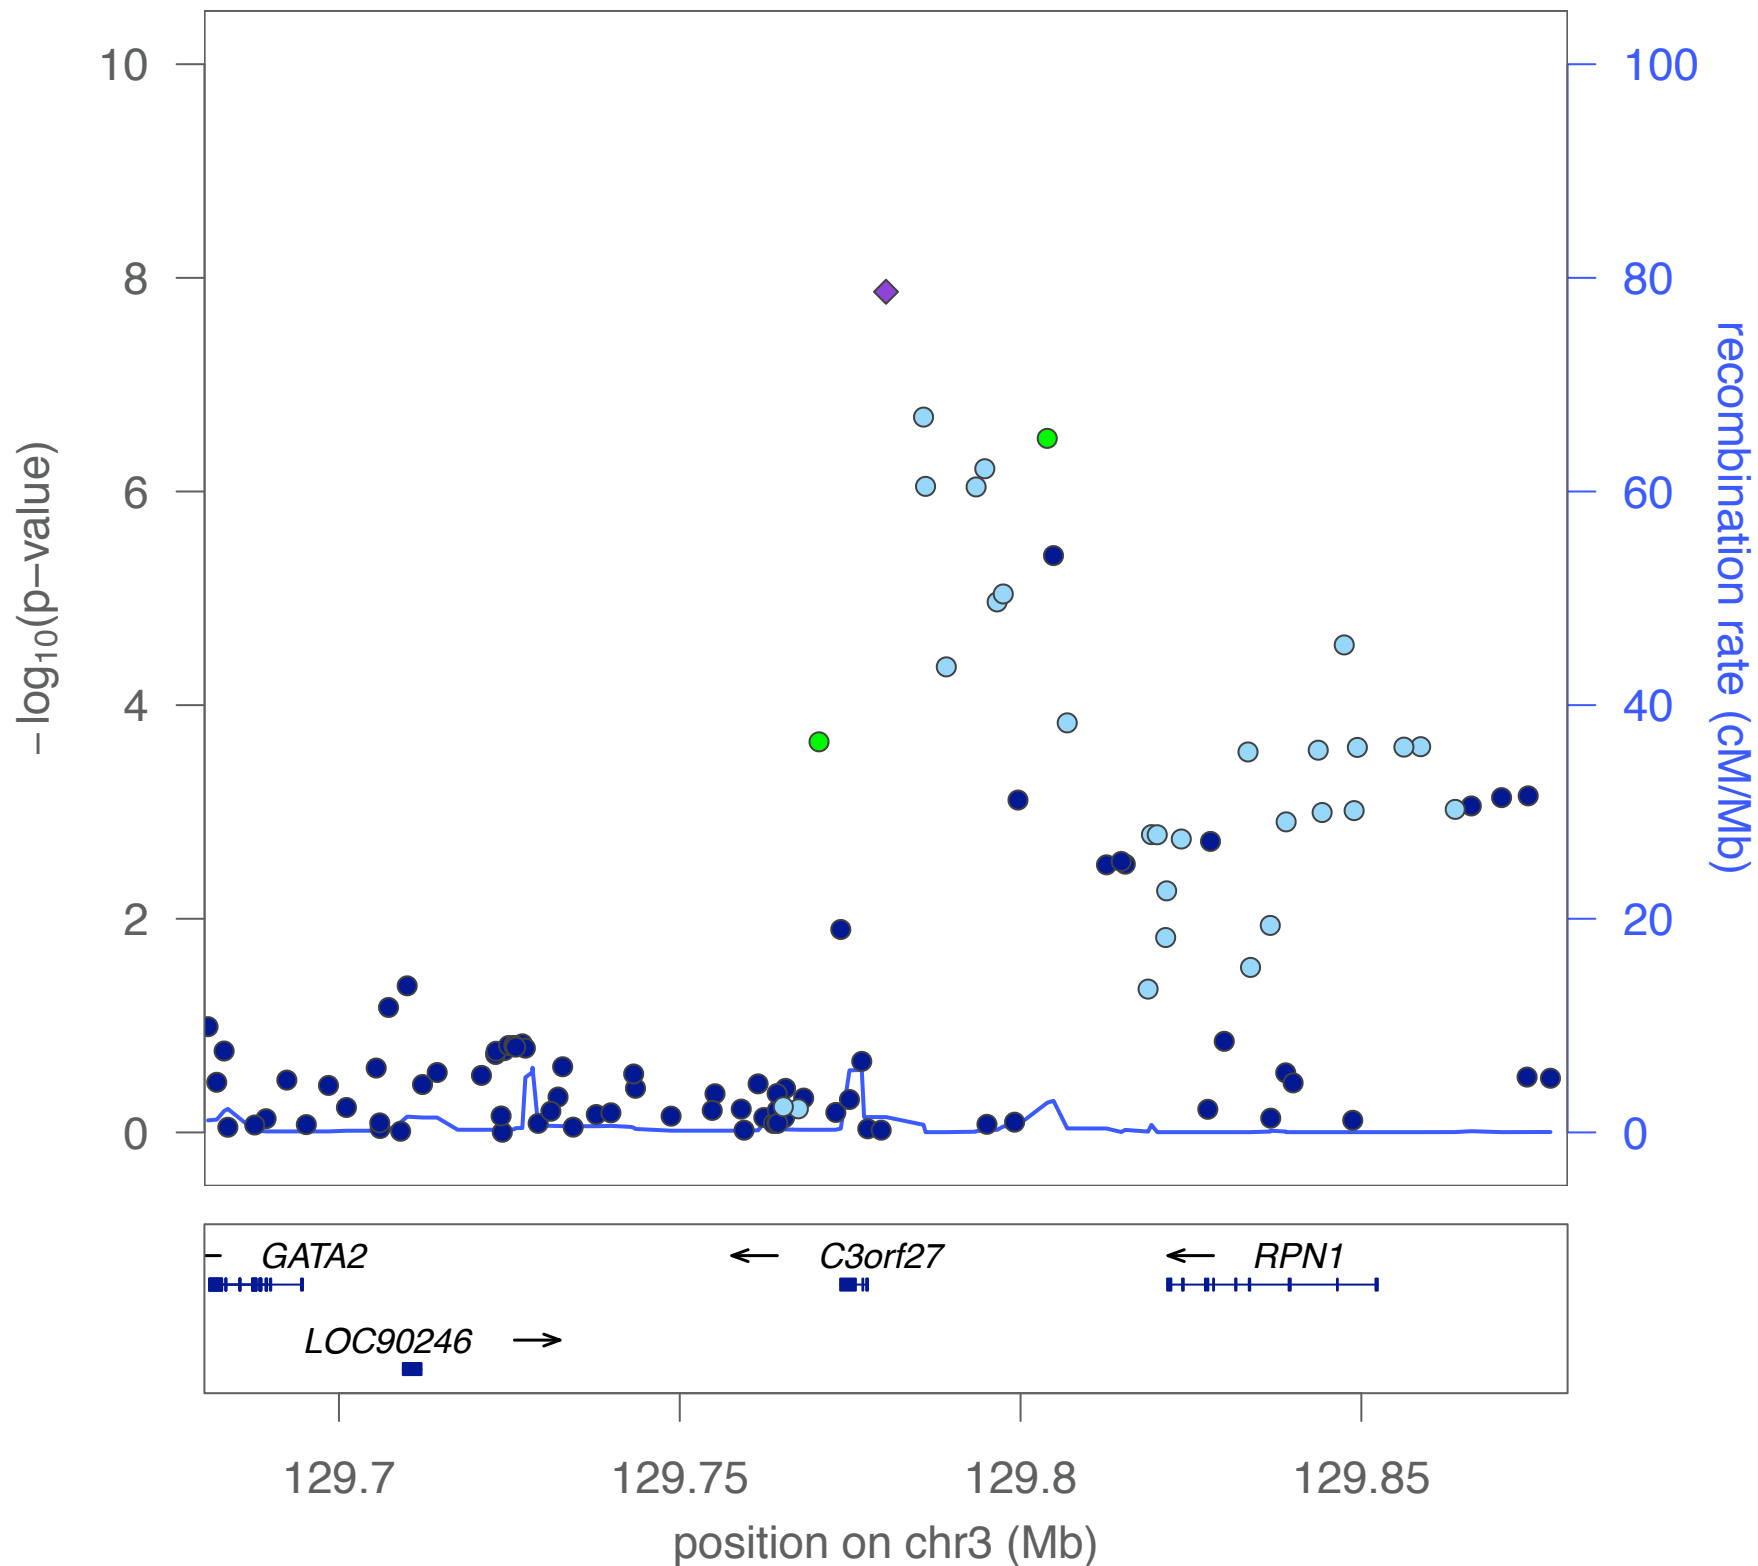

Supplement: pgen.1002113.s008.pdf [file pgen.1002113.s008.pdf]
