# Supplementary material for: Multiple Loci Are Associated with White Blood Cell Phenotypes
Source: PubMed Central journal article supplement (PMC3128114; doi:10.1371/journal.pgen.1002113), 2011-06-30

# Monocytes Chr9:112855726–113055726

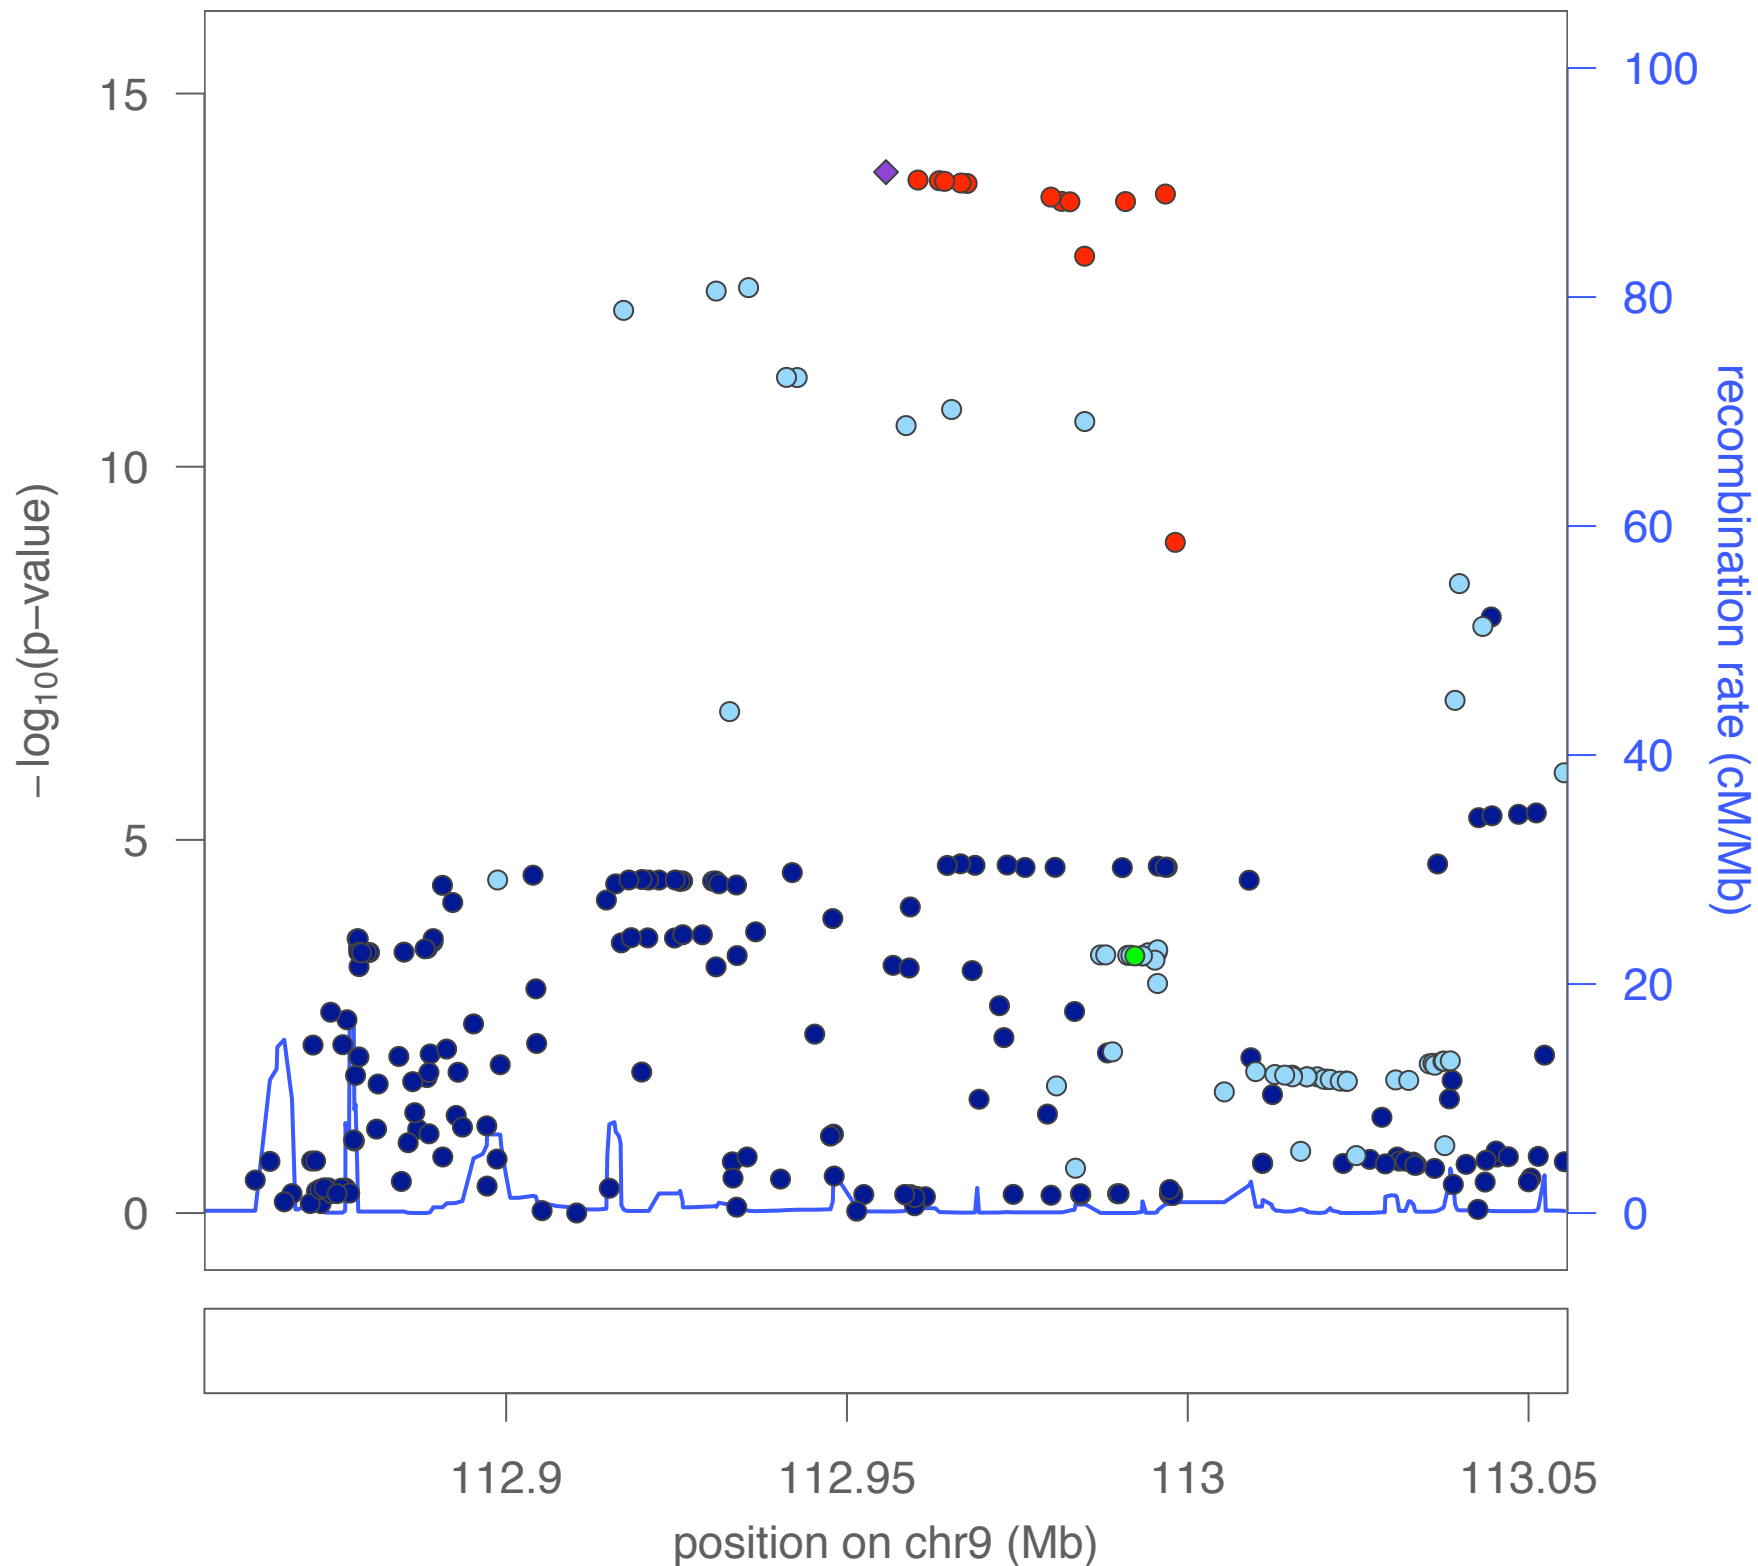

Supplement: pgen.1002113.s010.pdf [file pgen.1002113.s010.pdf]
