# Supplementary material for: Multiple Loci Are Associated with White Blood Cell Phenotypes
Source: PubMed Central journal article supplement (PMC3128114; doi:10.1371/journal.pgen.1002113), 2011-06-30
Supplement: pgen.1002113.s011.pdf [file pgen.1002113.s011.pdf]

| <b>Phenotype/Study</b>  | <b>AGES</b> | <b>ARIC</b> | <b>BLSA</b> | <b>FHS</b> | <b>Health ABC</b> | <b>InChianti</b> | <b>RS</b> | <b>Meta-analysis</b> |
|-------------------------|-------------|-------------|-------------|------------|-------------------|------------------|-----------|----------------------|
| WBC                     | 1.094       | 1.026       | 1.032       | 1.005      | 1.007             | 1.054            | 1.017     | 1.022                |
| <i>Granulocytes</i>     |             |             |             |            |                   |                  |           |                      |
| Basophils               | 1.046       | 1.008       | 0.977       | NA         | 1.121             | 0.977            | NA        | 1.000                |
| Eosinophils             | 1.024       | 0.993       | 0.977       | NA         | 0.977             | 0.977            | NA        | 1.010                |
| Neutrophils             | 1.05        | 1.031       | 1.006       | NA         | 0.977             | 1.029            | NA        | 1.015                |
| <i>Non-granulocytes</i> |             |             |             |            |                   |                  |           |                      |
| Lymphocytes             | 1.051       | 1.005       | 1.016       | NA         | 0.977             | 0.977            | 1.02      | 1.022                |
| Monocytes               | 1.055       | 1.006       | 1.012       | NA         | 0.99              | 1.004            | NA        | 1.019                |
