# Supplementary material for: Multiple Loci Are Associated with White Blood Cell Phenotypes
Source: PubMed Central journal article supplement (PMC3128114; doi:10.1371/journal.pgen.1002113), 2011-06-30
Supplement: pgen.1002113.s016.pdf [file pgen.1002113.s016.pdf]

| Primary Gene           | FDR adjusted P-value | Related genes from text mining with ranked keyword occurrence in parentheses                                                                                    |
|------------------------|----------------------|-----------------------------------------------------------------------------------------------------------------------------------------------------------------|
| MLZE                   | 0.002578089          | GSDM1(1), GSDML(50), C19orf44(165), FBXL20(488), FAM49B(602)                                                                                                    |
| GSDM1                  | 0.003492814          | C17orf37(2), GSDML(3), ZPBP2(4), GRB7(5), PERLD1(6), MLZE(9), ERBB2(24), FAM49B(431)                                                                            |
| MED24                  | 0.031794413          | MED1(11), MED26(20), THRA(98), CRKRS(253)                                                                                                                       |
| MED1                   | 0.041195074          | MED24(3), MED26(21), THRA(38), CRKRS(311)                                                                                                                       |
| MED26                  | 0.049341776          | MED24(20), MED1(44), CRKRS(331), RPN1(404)                                                                                                                      |
| CALR3                  | 0.053235178          | HLA-C(86), HLA-B(88), FAM49B(230)                                                                                                                               |
| CSF3                   | 0.058163179          | ITGA4(196), HLA-C(526), ERBB2(614), POU5F1(621)                                                                                                                 |
| STARD3                 | 0.07017308           | RPN1(88), PSMD3(494), CRKRS(597)                                                                                                                                |
| TCF19                  | 0.080379764          | HLA-C(1), PSORS1C2(2), CDSN(13), HLA-B(18), C6orf15(28), CCHCR1(30), PSORS1C1(47), RPN1(163), FBXL20(424), CRKRS(614)                                           |
| HLA-C                  | 0.10101982           | HLA-B(2), PSORS1C1(27), PSORS1C2(35), MICA(44), CDSN(62), CCHCR1(64), TCF19(68), C6orf15(134), HCG27(183), PSMD3(302), RPN1(405), HCG22(475)                    |
| EDG2                   | 0.1137693            | FAM49B(324), ITGA4(572)                                                                                                                                         |
| PNMT                   | 0.13258812           | C17orf37(31), PERLD1(105), PSMD3(167), RPN1(219), HLA-C(337), GSDM1(512)                                                                                        |
| C6orf15                | 0.14106459           | PSORS1C2(2), HCG22(3), CCHCR1(4), PSORS1C1(5), CDSN(6), HLA-C(8), TCF19(9), HLA-B(23), HCG27(34), RPN1(355), FBXL20(489), FAM49B(601)                           |
| CDSN                   | 0.22267963           | PSORS1C2(1), CCHCR1(2), PSORS1C1(4), HLA-C(5), C6orf15(8), TCF19(9), HLA-B(11), HCG27(69), HCG22(92), MICA(112), RPN1(385), PSMD3(489), ORMDL3(499), CRKRS(594) |
| PSMD3                  | 0.22712849           | FBXL20(310), CRKRS(397), RPN1(514)                                                                                                                              |
| GRB7                   | 0.23022918           | GSDM1(3), C17orf37(5), ERBB2(11), ZPBP2(25), PERLD1(41), GSDML(74), CRKRS(233), ITGA4(449)                                                                      |
| STAC2                  | 0.23555136           | C19orf44(304)                                                                                                                                                   |
| HLA-B                  | 0.23845161           | HLA-C(2), MICA(23), PSORS1C1(41), PSORS1C2(45), CDSN(65), TCF19(71), CCHCR1(107), C6orf15(161), HCG27(174), HCG22(355), CALR3(383), PSMD3(448), ORMDL3(465)     |
| IKZF3                  | 0.2411984            | POU5F1(263), HLA-C(475), CRKRS(573)                                                                                                                             |
| PSORS1C1               | 0.25264255           | PSORS1C2(2), CCHCR1(3), HLA-C(4), CDSN(6), HLA-B(8), C6orf15(11), TCF19(26), HCG27(29), HCG22(54), MICA(55), ORMDL3(57), GSDML(163)                             |
| C17orf37               | 0.28737799           | GSDM1(1), ERBB2(2), PERLD1(6), GRB7(12), GSDML(19), ZPBP2(41), CRKRS(159), FBXL20(239), FAM49B(444)                                                             |
| THRA                   | 0.29333468           | MED24(14), MED1(25), NR1D1(139), NEUROD2(489)                                                                                                                   |
| GSDML                  | 0.29770183           | ORMDL3(1), GSDM1(4), ZPBP2(5), C17orf37(18), PERLD1(85), ERBB2(242), HCG27(249), FAM49B(258), HLA-C(346), PSORS1C1(562), MLZE(622)                              |
| C19orf44               | 0.29848117           | STAC2(478)                                                                                                                                                      |
| MICA                   | 0.32331176           | HLA-B(2), HLA-C(3), PSORS1C1(69), CDSN(95), PSORS1C2(105), TCF19(126), HCG27(155), CCHCR1(177), ORMDL3(321), ERBB2(375), HCG22(379), GSDML(527), C6orf15(561)   |
| PSORS1C2               | 0.33695857           | PSORS1C1(2), CCHCR1(3), CDSN(4), HLA-C(5), C6orf15(6), HLA-B(9), TCF19(10), HCG27(27), HCG22(40), MICA(60), ORMDL3(97), GSDML(202)                              |
| FAM49B                 | 0.34954132           | C19orf44(395)                                                                                                                                                   |
| POU5F1                 | 0.36791912           | NEUROD2(411)                                                                                                                                                    |
| HCG22                  | 0.37134145           | HCG27(4), C6orf15(6), PSORS1C1(35), HLA-C(42), PSORS1C2(46), CCHCR1(48), CDSN(51), HLA-B(86), ORMDL3(90), TCF19(472)                                            |
| TCAP                   | 0.38464911           | PSMD3(534), RPN1(615)                                                                                                                                           |
| CCHCR1                 | 0.38713972           | PSORS1C1(2), PSORS1C2(3), CDSN(4), HLA-C(5), C6orf15(6), TCF19(12), HLA-B(18), HCG22(29), HCG27(31), MICA(87), ORMDL3(129), GSDML(160), STARD3(338)             |
| ERBB2                  | 0.38991754           | C17orf37(4), GRB7(180), GSDM1(197), CRKRS(446), HLA-C(582)                                                                                                      |
| PERLD1                 | 0.39804651           | C17orf37(125), GSDM1(159), FBXL20(324)                                                                                                                          |
| NEUROD2                | 0.42549494           | POU5F1(202)                                                                                                                                                     |
| ORMDL3                 | 0.45004057           | GSDML(2), FBXL20(147), HCG27(318)                                                                                                                               |
| SNORD124               | 1                    | SNORD124(7), FBXL20(555)                                                                                                                                        |
| ZPBP2                  | 1                    | GSDML(2), GSDM1(3), C17orf37(15), ORMDL3(18), GRB7(35), PERLD1(48), HCG27(361), STAC2(388)                                                                      |
| <a href="#">ZNF483</a> | 1                    |                                                                                                                                                                 |
| KIAA0368               | 1                    | FBXL20(362), CRKRS(572)                                                                                                                                         |
| C3orf27                | 1                    | RPN1(5), GSDML(314), ERBB2(451), ORMDL3(463), HLA-C(555)                                                                                                        |
| HCG27                  | 1                    | HCG22(8), HLA-C(284), STAC2(299), PSORS1C1(313), ORMDL3(325), PSORS1C2(353), CDSN(498), HLA-B(503), C6orf15(530), CCHCR1(570)                                   |
| OR2K2                  | 1                    | FBXL20(547)                                                                                                                                                     |
| ITGA4                  | 1                    | POU5F1(430), HLA-C(439)                                                                                                                                         |
| CRKRS                  | 1                    | FBXL20(141)                                                                                                                                                     |
| EPS15L1                | 1                    | CRKRS(155), FBXL20(278)                                                                                                                                         |
| RPN1                   | 1                    | FBXL20(264), CRKRS(437)                                                                                                                                         |
| PPP1R1B                | 1                    | ERBB2(402), NEUROD2(531), CRKRS(540)                                                                                                                            |
| <a href="#">FBXL20</a> | 1                    |                                                                                                                                                                 |
| NR1D1                  | 1                    | THRA(22), MED24(64), MED1(65), CRKRS(557)                                                                                                                       |
