# Supplementary material for: Multiple Loci Are Associated with White Blood Cell Phenotypes
Source: PubMed Central journal article supplement (PMC3128114; doi:10.1371/journal.pgen.1002113), 2011-06-30
Supplement: pgen.1002113.s018.pdf [file pgen.1002113.s018.pdf]

| <b>SNP</b> | <b>Phenotype</b> | <b>Discovery</b> |            |           | <b>iHS</b>   | <b>Selection Type</b> | <b>Direction of Selection</b> |
|------------|------------------|------------------|------------|-----------|--------------|-----------------------|-------------------------------|
|            |                  | <b>P-value</b>   | <b>CHR</b> | <b>BP</b> |              |                       |                               |
| rs4328821  | Basophils        | 2.58E-08         | 3          | 129799125 | -0.159181497 | none                  | none                          |
| rs12536825 | Eosinophils      | 7.97E-08         | 7          | 20470388  | 0.333762565  | none                  | none                          |
| rs2524079  | Lymphocytes      | 1.85E-08         | 6          | 31350153  | -1.296173102 | none                  | none                          |
| rs10402422 | Lymphocytes      | 1.67E-08         | 19         | 16336388  | -1.834123325 | recent_moderate       | negative                      |
| rs10404046 | Lymphocytes      | 8.97E-09         | 19         | 16338255  | -1.910718265 | recent_moderate       | negative                      |
| rs2034892  | Lymphocytes      | 1.29E-08         | 19         | 16352549  | -2.058966537 | strong                | negative                      |
| rs2290669  | Lymphocytes      | 4.55E-08         | 19         | 16356774  | -1.64110875  | recent_moderate       | negative                      |
| rs8110761  | Lymphocytes      | 7.16E-09         | 19         | 16362005  | -1.926778495 | recent_moderate       | negative                      |
| rs1870071  | Lymphocytes      | 3.31E-08         | 19         | 16366106  | -1.984842401 | recent_moderate       | negative                      |
| rs873636   | Lymphocytes      | 6.65E-09         | 19         | 16375771  | -2.139267684 | strong                | negative                      |
| rs10411936 | Lymphocytes      | 3.85E-09         | 19         | 16409375  | -1.91318907  | recent_moderate       | negative                      |
| rs11878602 | Lymphocytes      | 3.42E-09         | 19         | 16416153  | -1.92430769  | recent_moderate       | negative                      |
| rs7256818  | Lymphocytes      | 4.91E-09         | 19         | 16419766  | -1.824240107 | recent_moderate       | negative                      |
| rs2607278  | Lymphocytes      | 5.65E-09         | 19         | 16429197  | -1.803238268 | recent_moderate       | negative                      |
| rs1449263  | Monocytes        | 6.71E-14         | 2          | 182027546 | -0.326331027 | none                  | none                          |
| rs1375493  | Monocytes        | 8.40E-13         | 2          | 182032011 | -0.431863965 | none                  | none                          |
| rs2124440  | Monocytes        | 6.93E-14         | 2          | 182036459 | -0.734358567 | none                  | none                          |
| rs9880192  | Monocytes        | 1.35E-08         | 3          | 129780259 | 0.355951036  | none                  | none                          |
| rs10107630 | Monocytes        | 3.71E-10         | 8          | 130672817 | -0.713146126 | none                  | none                          |
| rs13277237 | Monocytes        | 1.45E-10         | 8          | 130673745 | -0.629216638 | none                  | none                          |
| rs4480083  | Monocytes        | 9.83E-11         | 8          | 130678502 | -0.485323514 | none                  | none                          |
| rs4407843  | Monocytes        | 9.76E-11         | 8          | 130678550 | -0.485323514 | none                  | none                          |
| rs2163952  | Monocytes        | 1.11E-10         | 8          | 130679571 | 1.475504671  | none                  | none                          |
| rs10098310 | Monocytes        | 1.44E-10         | 8          | 130682796 | -0.381821443 | none                  | none                          |
| rs1991866  | Monocytes        | 4.58E-11         | 8          | 130693287 | 1.068696588  | none                  | none                          |
| rs10817149 | Monocytes        | 8.03E-13         | 9          | 112917232 | 0.488029973  | none                  | none                          |
| rs1888190  | Monocytes        | 4.43E-13         | 9          | 112930821 | 0.556419597  | none                  | none                          |
| rs10980800 | Monocytes        | 1.13E-14         | 9          | 112955726 | -0.207062326 | none                  | none                          |
| rs10980802 | Monocytes        | 2.81E-11         | 9          | 112958677 | -0.488977861 | none                  | none                          |
| rs12346772 | Monocytes        | 1.44E-14         | 9          | 112960420 | -0.483739256 | none                  | none                          |
| rs12350763 | Monocytes        | 1.47E-14         | 9          | 112963544 | -0.465755255 | none                  | none                          |
| rs7034139  | Monocytes        | 1.50E-14         | 9          | 112964338 | -0.465755255 | none                  | none                          |
| rs7023923  | Monocytes        | 1.71E-11         | 9          | 112965355 | 1.043440839  | none                  | none                          |
| rs1330279  | Monocytes        | 1.58E-14         | 9          | 112966729 | -0.479589102 | none                  | none                          |
| rs12337595 | Monocytes        | 1.60E-14         | 9          | 112967622 | -0.479589102 | none                  | none                          |
| rs10124626 | Monocytes        | 2.44E-14         | 9          | 112979928 | -0.48788941  | none                  | none                          |
| rs10123393 | Monocytes        | 2.78E-14         | 9          | 112981491 | -0.450538024 | none                  | none                          |
| rs17812386 | Monocytes        | 2.82E-14         | 9          | 112982709 | -0.450538024 | none                  | none                          |
| rs12339649 | Monocytes        | 1.51E-13         | 9          | 112984867 | 0.806975828  | none                  | none                          |
| rs2150052  | Monocytes        | 2.48E-11         | 9          | 112984888 | 1.174330765  | none                  | none                          |
| rs17207270 | Monocytes        | 2.80E-14         | 9          | 112990865 | -0.472672179 | none                  | none                          |
| rs12339151 | Monocytes        | 2.22E-14         | 9          | 112996722 | -0.280381712 | none                  | none                          |
| rs2039183  | Monocytes        | 1.03E-09         | 9          | 112998172 | -0.223662942 | none                  | none                          |
| rs824016   | Monocytes        | 1.03E-08         | 9          | 113044530 | -0.896224772 | none                  | none                          |
| rs7207600  | Neutrophils      | 3.33E-09         | 17         | 35345186  | -0.080361431 | none                  | none                          |
| rs8065126  | Neutrophils      | 2.71E-09         | 17         | 35352561  | -0.079033473 | none                  | none                          |
| rs9895948  | Neutrophils      | 1.74E-09         | 17         | 35361889  | -0.196494185 | none                  | none                          |
| rs17609240 | Neutrophils      | 1.60E-09         | 17         | 35364215  | 1.050540958  | none                  | none                          |
| rs8076474  | Neutrophils      | 1.63E-09         | 17         | 35364760  | -0.29399235  | none                  | none                          |
| rs1007655  | Neutrophils      | 8.18E-10         | 17         | 35364945  | 1.107439301  | none                  | none                          |
| rs2313640  | Neutrophils      | 7.76E-10         | 17         | 35365371  | -0.223780878 | none                  | none                          |
| rs7218742  | Neutrophils      | 8.92E-10         | 17         | 35367887  | -0.223780878 | none                  | none                          |

|            |             |          |    |          |              |      |      |
|------------|-------------|----------|----|----------|--------------|------|------|
| rs7218321  | Neutrophils | 8.83E-10 | 17 | 35367995 | 1.012245728  | none | none |
| rs7219080  | Neutrophils | 7.42E-10 | 17 | 35368042 | -0.222452921 | none | none |
| rs6503527  | Neutrophils | 6.54E-10 | 17 | 35368245 | -0.225108836 | none | none |
| rs3859192  | Neutrophils | 1.79E-08 | 17 | 35382174 | -0.089723143 | none | none |
| rs8075668  | Neutrophils | 3.71E-17 | 17 | 35391149 | 0.631032855  | none | none |
| rs2305481  | Neutrophils | 3.79E-15 | 17 | 35392150 | -0.185489268 | none | none |
| rs11655264 | Neutrophils | 3.60E-17 | 17 | 35392521 | 0.28715536   | none | none |
| rs2305482  | Neutrophils | 1.01E-20 | 17 | 35394453 | 0.110907326  | none | none |
| rs11078930 | Neutrophils | 3.65E-16 | 17 | 35395481 | -0.782851133 | none | none |
| rs4065321  | Neutrophils | 4.09E-21 | 17 | 35397074 | 0.79179698   | none | none |
| rs9915252  | Neutrophils | 1.89E-21 | 17 | 35398614 | 0.177366169  | none | none |
| rs8066582  | Neutrophils | 1.01E-15 | 17 | 35400455 | 0.167334646  | none | none |
| rs11658328 | Neutrophils | 9.41E-22 | 17 | 35402762 | 0.445709421  | none | none |
| rs8073254  | Neutrophils | 9.30E-22 | 17 | 35402876 | 0.445709421  | none | none |
| rs2241245  | Neutrophils | 9.08E-22 | 17 | 35404540 | 0.331600842  | none | none |
| rs12453334 | Neutrophils | 9.01E-16 | 17 | 35406999 | -1.175926656 | none | none |
| rs4794822  | Neutrophils | 3.64E-23 | 17 | 35410238 | 0.907439672  | none | none |
| rs8070454  | Neutrophils | 3.48E-15 | 17 | 35414280 | -0.010927767 | none | none |
| rs8078723  | Neutrophils | 2.84E-23 | 17 | 35420405 | -0.000656397 | none | none |
| rs2227319  | Neutrophils | 5.82E-16 | 17 | 35424371 | -1.143433811 | none | none |
| rs2227321  | Neutrophils | 7.26E-16 | 17 | 35424820 | -1.142116144 | none | none |
| rs2227322  | Neutrophils | 3.69E-23 | 17 | 35425194 | 0.0173185    | none | none |
| rs25645    | Neutrophils | 1.67E-15 | 17 | 35426669 | -1.269929927 | none | none |
| rs1042658  | Neutrophils | 6.18E-23 | 17 | 35427428 | 0.059687901  | none | none |
| rs709592   | Neutrophils | 6.35E-23 | 17 | 35429079 | 0.059687901  | none | none |
| rs2270401  | Neutrophils | 1.25E-15 | 17 | 35429782 | -1.221176216 | none | none |
| rs3213762  | Neutrophils | 8.56E-23 | 17 | 35432153 | 0.100773381  | none | none |
| rs12451897 | Neutrophils | 1.34E-15 | 17 | 35432801 | -1.044608721 | none | none |
| rs2302777  | Neutrophils | 1.72E-15 | 17 | 35433018 | 1.512416013  | none | none |
| rs9916158  | Neutrophils | 2.14E-15 | 17 | 35435755 | -0.728368431 | none | none |
| rs2302774  | Neutrophils | 6.34E-15 | 17 | 35436616 | -0.594173516 | none | none |
| rs7502514  | Neutrophils | 3.95E-21 | 17 | 35442370 | -0.209632294 | none | none |
| rs8065443  | Neutrophils | 3.91E-19 | 17 | 35462466 | 0.74660358   | none | none |
| rs9262628  | WBC         | 4.23E-08 | 6  | 31131127 | -0.242585041 | none | none |
| rs2523852  | WBC         | 4.22E-08 | 6  | 31131847 | -0.258410293 | none | none |
| rs2517525  | WBC         | 2.41E-08 | 6  | 31133340 | -0.344840512 | none | none |
| rs2517524  | WBC         | 2.64E-09 | 6  | 31133692 | -1.326108408 | none | none |
| rs2523846  | WBC         | 2.82E-08 | 6  | 31134568 | -0.220673155 | none | none |
| rs2517510  | WBC         | 2.78E-08 | 6  | 31138101 | -0.280322179 | none | none |
| rs2517500  | WBC         | 2.42E-08 | 6  | 31141488 | 1.137449276  | none | none |
| rs2523890  | WBC         | 3.92E-08 | 6  | 31147511 | -0.171431457 | none | none |
| rs2246330  | WBC         | 2.37E-08 | 6  | 31149472 | -0.486050447 | none | none |
| rs2523883  | WBC         | 1.68E-08 | 6  | 31150049 | 1.489266598  | none | none |
| rs2523880  | WBC         | 3.18E-08 | 6  | 31150748 | -0.537178182 | none | none |
| rs2249231  | WBC         | 3.18E-08 | 6  | 31151211 | -0.537178182 | none | none |
| rs2523843  | WBC         | 2.98E-08 | 6  | 31154507 | -0.37405636  | none | none |
| rs2249876  | WBC         | 2.52E-08 | 6  | 31156366 | -0.16954542  | none | none |
| rs9263474  | WBC         | 2.41E-08 | 6  | 31158223 | 1.258674721  | none | none |
| rs2535317  | WBC         | 2.79E-08 | 6  | 31159833 | 1.249451046  | none | none |
| rs2517471  | WBC         | 2.80E-08 | 6  | 31160077 | -0.224325136 | none | none |
| rs2535307  | WBC         | 2.10E-08 | 6  | 31161720 | -0.225542463 | none | none |
| rs2535306  | WBC         | 2.11E-08 | 6  | 31161846 | 1.204650338  | none | none |
| rs2249742  | WBC         | 1.73E-08 | 6  | 31348700 | -1.156814348 | none | none |
| rs7207600  | WBC         | 1.01E-08 | 17 | 35345186 | -0.080361431 | none | none |

|            |     |          |    |          |              |      |      |
|------------|-----|----------|----|----------|--------------|------|------|
| rs8065126  | WBC | 8.84E-09 | 17 | 35352561 | -0.079033473 | none | none |
| rs4065985  | WBC | 1.31E-08 | 17 | 35355458 | 0.4023922    | none | none |
| rs9895948  | WBC | 2.79E-09 | 17 | 35361889 | -0.196494185 | none | none |
| rs17609240 | WBC | 4.46E-09 | 17 | 35364215 | 1.050540958  | none | none |
| rs8076474  | WBC | 3.12E-09 | 17 | 35364760 | -0.29399235  | none | none |
| rs1007655  | WBC | 1.75E-09 | 17 | 35364945 | 1.107439301  | none | none |
| rs2313640  | WBC | 2.68E-09 | 17 | 35365371 | -0.223780878 | none | none |
| rs7218742  | WBC | 2.67E-09 | 17 | 35367887 | -0.223780878 | none | none |
| rs7218321  | WBC | 2.65E-09 | 17 | 35367995 | 1.012245728  | none | none |
| rs7219080  | WBC | 1.02E-09 | 17 | 35368042 | -0.222452921 | none | none |
| rs6503527  | WBC | 9.88E-10 | 17 | 35368245 | -0.225108836 | none | none |
| rs3859192  | WBC | 2.17E-11 | 17 | 35382174 | -0.089723143 | none | none |
| rs8075668  | WBC | 1.09E-14 | 17 | 35391149 | 0.631032855  | none | none |
| rs2305481  | WBC | 6.93E-13 | 17 | 35392150 | -0.185489268 | none | none |
| rs11655264 | WBC | 1.07E-14 | 17 | 35392521 | 0.28715536   | none | none |
| rs2305482  | WBC | 5.22E-19 | 17 | 35394453 | 0.110907326  | none | none |
| rs11078930 | WBC | 7.02E-14 | 17 | 35395481 | -0.782851133 | none | none |
| rs4065321  | WBC | 2.58E-19 | 17 | 35397074 | 0.79179698   | none | none |
| rs9915252  | WBC | 1.29E-19 | 17 | 35398614 | 0.177366169  | none | none |
| rs8066582  | WBC | 5.90E-16 | 17 | 35400455 | 0.167334646  | none | none |
| rs11658328 | WBC | 5.53E-20 | 17 | 35402762 | 0.445709421  | none | none |
| rs8073254  | WBC | 5.43E-20 | 17 | 35402876 | 0.445709421  | none | none |
| rs2241245  | WBC | 5.55E-20 | 17 | 35404540 | 0.331600842  | none | none |
| rs12453334 | WBC | 3.22E-13 | 17 | 35406999 | -1.175926656 | none | none |
| rs4794822  | WBC | 3.23E-23 | 17 | 35410238 | 0.907439672  | none | none |
| rs2227319  | WBC | 2.09E-13 | 17 | 35424371 | -1.143433811 | none | none |
| rs2227321  | WBC | 2.09E-13 | 17 | 35424820 | -1.142116144 | none | none |
| rs25645    | WBC | 9.95E-14 | 17 | 35426669 | -1.269929927 | none | none |
| rs2270401  | WBC | 2.15E-13 | 17 | 35429782 | -1.221176216 | none | none |
| rs12451897 | WBC | 2.75E-13 | 17 | 35432801 | -1.044608721 | none | none |
| rs2302777  | WBC | 2.71E-13 | 17 | 35433018 | 1.512416013  | none | none |
| rs9916158  | WBC | 4.97E-13 | 17 | 35435755 | -0.728368431 | none | none |
| rs2302774  | WBC | 1.16E-12 | 17 | 35436616 | -0.594173516 | none | none |
| rs11078936 | WBC | 1.52E-08 | 17 | 35451440 | -0.374613523 | none | none |
| rs8065443  | WBC | 4.91E-20 | 17 | 35462466 | 0.74660358   | none | none |
| rs7502966  | WBC | 1.02E-10 | 17 | 35470048 | 0.072527114  | none | none |
