# Supplementary material for: Multiple Loci Are Associated with White Blood Cell Phenotypes
Source: PLoS Genet. 2011 Jun 30;7(6):e1002113. doi: 10.1371/journal.pgen.1002113 (PMC3128114; doi:10.1371/journal.pgen.1002113)
Supplement: Table S5 — Adjusted r2 estimates across phenotypes. (XLSX) [file pgen.1002113.s015.xlsx]

## Sheet: Sheet1
	WBC	Basophils	Eosinophils	Neutrophils	Lymphocytes	Monocytes
WBC	1	0.0640511	0.270743	0.871109	0.477791	0.479586
Basophils		1	0.157018	0.0330642	0.115642	0.16533
Eosinophils			1	0.148217	0.16896	0.206176
Neutrophils				1	0.100256	0.347271
Lymphocytes					1	0.254879
Monocytes						1
